# Supplementary material
Source: Elsevier journal article supplement (https://www.sciencedirect.com/science/article/pii/S2341287922001259)
Supplement: mmc1 [file S2341287922001259:mmc1.docx]

APPENDIX

**Supplementary material**

Wood-Downes severity scale modified by Ferrés: mild (0‐3 points), moderate (4‐7 points) and severe (8‐14 points).

| **Points** | **Wheezing** | **Retractions** | **Respiratory rate (bpm)** | **Heart rate (beats/min)** | **Ventilation** | **Cyanosis** |
| --- | --- | --- | --- | --- | --- | --- |
| **0** | No | No | < 30 | < 120 | Good, symmetrical | No |
| **1** | End of expiration | Subcostal + lower intercostal | 31‐45 | > 120 | Fair, symmetrical | Yes |
| **2** | Entire expiratory phase | Previous entry + supraclavicular + nasal flaring | 46‐60 |  | Markedly reduced |  |
| **3** | Inspiration and expiration | Previous entry + upper intercostal + suprasternal | > 60 |  | Thorax silent (no wheezing) |  |

bpm: breaths per minute; min, minute.

Hospital de Cruces acute bronchiolitis severity assessment scale: mild (0‐1 points), moderate (2‐4 points) and severe (5‐8 points).

| **Points** | **Respiratory rate (bpm)** | **Pulmonary auscultations** | **Retractions** | **O2Sat (%)** |
| --- | --- | --- | --- | --- |
| **0** | <45 | Mild hypoventilation, subcrepitant rales or wheezing at the end of expiration | None or slight: subcostal, intercostal | > 94 |
| **1** | 46‐60 | Moderate hypoventilation, wheezing in the entire expiratory phase | Moderate: supraclavicular, nasal flaring | 92‐94 |
| **2** | >60 | Severe hypoventilation, expiratory/inspiratory wheezing | Intense: suprasternal | < 92 |

bpm, breaths per minute; O2Sat, oxygen saturation.
